# Supplementary material for: Early In Vivo Osteogenic and Inflammatory Response of 3D Printed Polycaprolactone/Carbon Nanotube/Hydroxyapatite/Tricalcium Phosphate Composite Scaffolds
Source: MDPI journal article supplement (doi:10.3390/polym15132952), 2023-07-05
Supplement: s1 [file s1]

## Supplementary material

**Table S1.** TaqMan assays.

| <b>Genes</b>                  | <b>Biological function</b>                                               | <b>Codes</b>         |
|-------------------------------|--------------------------------------------------------------------------|----------------------|
| <i>Gapdh</i>                  | Glycolysis pathway's enzyme                                              | <u>Rn01775763_g1</u> |
| <i>Runx-2</i>                 | MSC differentiation into immature osteoblasts                            | Rn01512298_m1        |
| <i>Osterix</i>                | Expressed by mature osteoblasts, promotes osteogenesis                   | Rn02769744_s1        |
| <i>Bmp-2</i>                  | Bone formation                                                           | <u>Rn00567818_m1</u> |
| <i>Bmp-7</i>                  | Bone formation and angiogenesis                                          | Rn01528889_m1        |
| <i>Vegf</i>                   | Blood vessels formation stimulation                                      | <u>Rn01511602_m1</u> |
| <i>Il-6</i>                   | Organism defence during the acute inflammation process and tissue lesion | Rn01410330_m1        |
| <i>Il-1<math>\beta</math></i> | Pro-inflammatory cytokine secreted by macrophages                        | Rn01460205_m1        |
| <i>Ccr7</i>                   | Chemokine (C-C motif) receptor 7; M1-macrophage phenotype                | Rn02758813_s1        |
| <i>CD86</i>                   | M1-macrophage phenotype surface marker                                   | Rn00571654_m1        |
| <i>CD68</i>                   | Pan-macrophage phenotype surface marker                                  | Rn01495634_g1        |
| <i>Il-10</i>                  | Inflammation control and modulation of the adaptive immune response      | Rn01483988_g1        |
| <i>Il-1rn</i>                 | Interleukin 1 receptor antagonist; M2-macrophage phenotype               | Rn02586400_m1        |
| <i>CD163</i>                  | M2-macrophage phenotype surface marker                                   | Rn01492519_m1        |
| <i>Arg1</i>                   | Arginase 1; M2a-macrophage phenotype                                     | Rn00691090_m1        |
